# Supplementary material
Source: publisher figshare collection journal article supplement (https://diabetesjournals.figshare.com/ndownloader/files/34205660)
Supplement: Supplementary file 1 [file 34205660]

## Supplementary Appendix Table of Contents

| <b>Content</b> | <b>Description</b>                                                                                                                                                                       | <b>Page</b> |
|----------------|------------------------------------------------------------------------------------------------------------------------------------------------------------------------------------------|-------------|
| Figure S1      | Study sample buildup                                                                                                                                                                     | 2-3         |
| Table S1       | Characteristics of mothers included in the study compared to women without offspring who completed pre-recruitment evaluation                                                            | 4           |
| Table S2       | Mothers with living offspring who completed pre-recruitment evaluations, according to the year at gestational diabetes screening                                                         | 5           |
| Table S3       | Characteristics at adolescence of mothers included in the study (insured by Maccabi Healthcare Services) vs. women who were insured by all health maintenance organizations in Israel    | 6           |
| Table S4       | Odds ratios of gestational glucose intolerance in a model that adjusted for adolescent BMI of the offspring's fathers                                                                    | 7           |
| Table S5       | A sensitivity analysis limited to mothers who were screened during the year 2001                                                                                                         | 8           |
| Table S6       | A sensitivity analysis limited to mothers without overweight/obesity at adolescence                                                                                                      | 9           |
| Table S7       | A sensitivity analysis limited to mothers with unimpaired health at adolescence                                                                                                          | 10          |
| Table S8       | Odds ratios of gestational glucose intolerance in a model in which the study outcome was defined as a combination of offspring adolescent abnormal blood pressure and overweight/obesity | 11          |
| Table S9       | Odds ratios of gestational glucose intolerance using WHO definitions for overweight, mild obesity and severe obesity                                                                     | 12          |
| Table S10      | A sensitivity analysis limited to mothers who were not treated with insulin during pregnancy                                                                                             | 13          |
| Table S11      | A sensitivity analysis limited to women who were not diagnosed with type diabetes 2 after delivery and until data extraction                                                             | 14          |

## Supplementary Figure S1: Study sample buildup

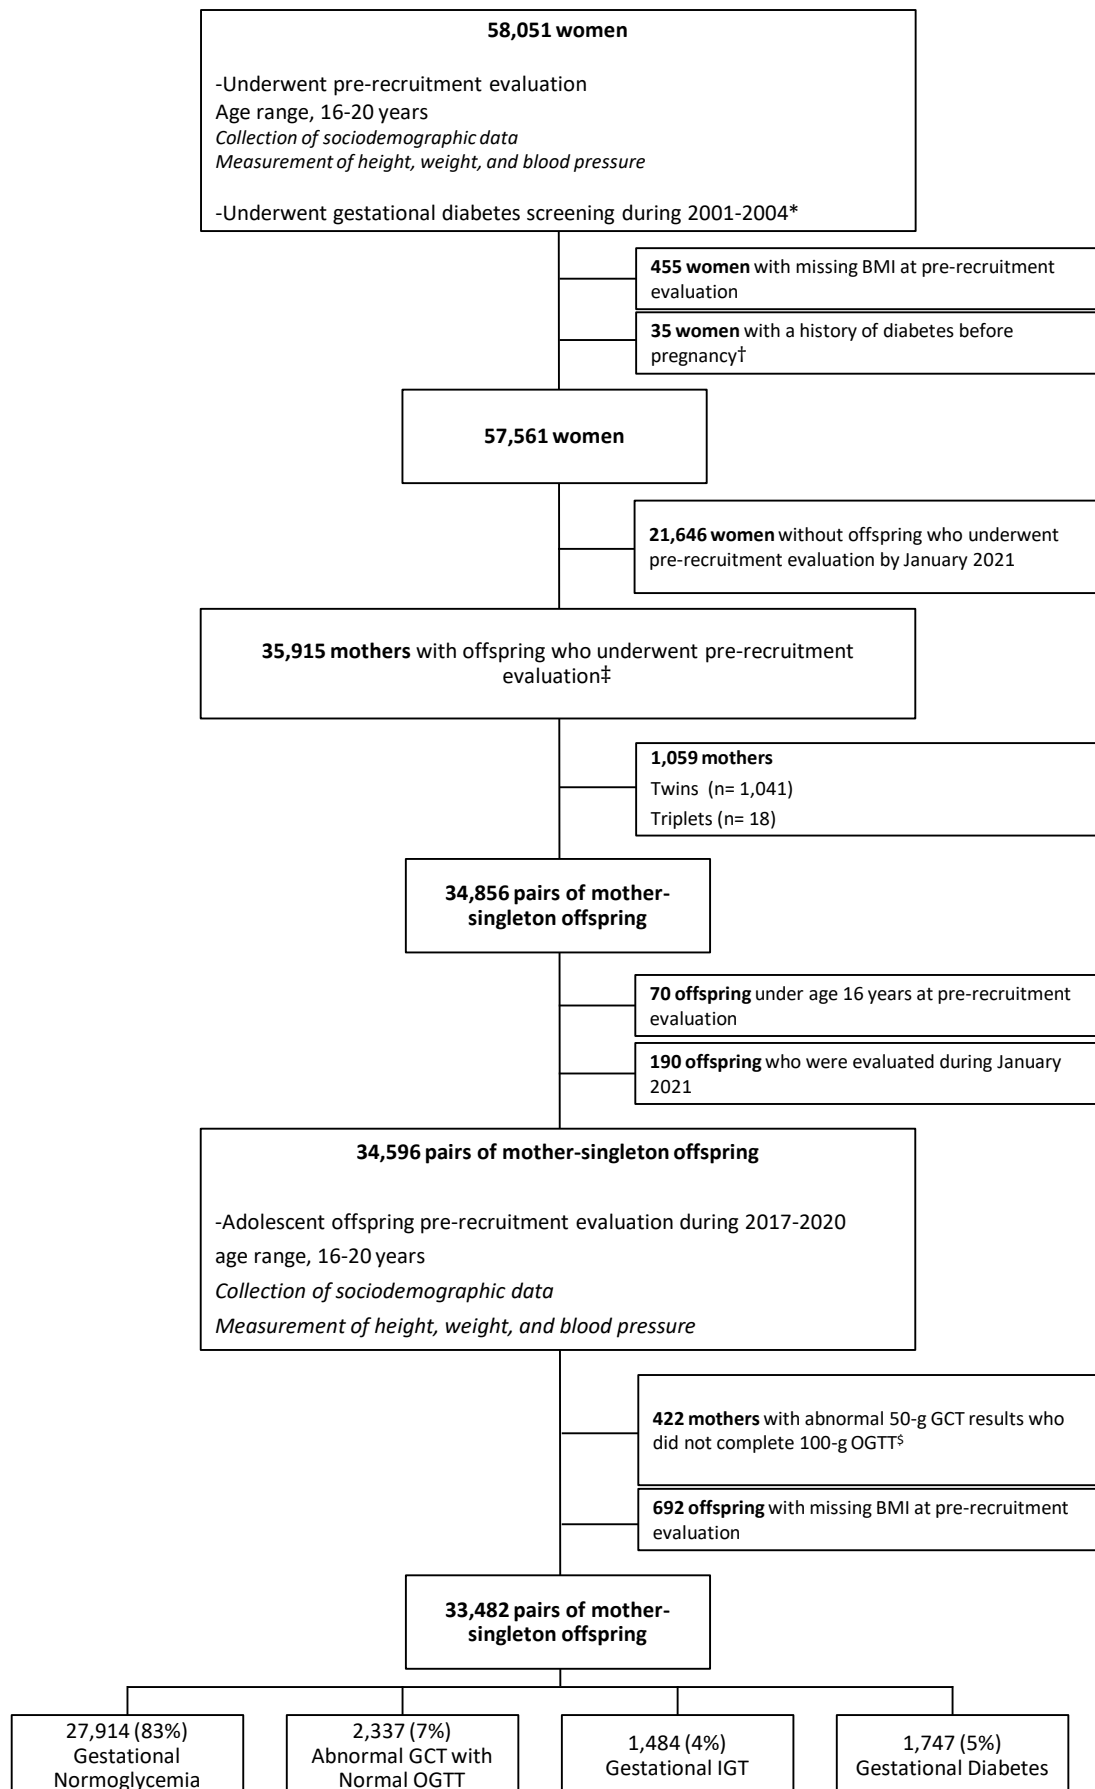

In total, 58,051 women underwent pre-recruitment evaluation one-year prior to military conscription (age 16-20 years) and had a documented pregnancy at a single health maintenance organization (Maccabi Healthcare Services; MHS).

\* Digital laboratory documentation of glucose screening tests for gestational diabetes was established at MHS in 2001. We included women who were screened for gestational diabetes until 2004, which was the latest year that allowed the minimal possible time interval for the offspring to attend the pre-recruitment medical evaluation (performed at age 16 to 20 years).

† Excluded were women who were diagnosed with diabetes by medical history collected at adolescence (pre-recruitment medical evaluation) or diagnosed with diabetes prior to the GCT date (according to the MHS diabetes registry; See the 'Extended Methods' section).

‡ Matching between mothers and their offspring was based on civilian identification numbers. The suitable offspring for a mother's pregnancy was chosen as the child born up to 6 months after the first recorded GCT, with comprehensive pre-recruitment evaluation. If more than one pregnancy with a suitable offspring was documented, the first pregnancy was chosen. For 21,646 women, we did not identify an offspring who underwent pre-recruitment evaluation by January 2021; these women were thus excluded from the cohort (See Table S1).

\$ Women with GCT  $\geq 200$  mg/dL were usually not referred to an OGTT, as they were already considered to have gestational diabetes. These women were classified as having gestational diabetes in this study.

GCT, glucose challenge test; OGTT, oral glucose tolerance test; IGT, impaired glucose tolerance

**Supplementary Table S1: Characteristics of mothers included in the study compared to women without offspring who completed pre-recruitment evaluation.**

|                                                  | Our cohort    | Women without offspring who completed pre-recruitment evaluation |
|--------------------------------------------------|---------------|------------------------------------------------------------------|
| Number of women                                  | 33,482        | 21,362*                                                          |
| <b>Mothers at adolescence</b>                    |               |                                                                  |
| Age, years                                       | 17.4 ± 0.4    | 17.4 ± 0.4                                                       |
| BMI, kg/m <sup>2</sup>                           | 21.3 ± 2.9    | 21.4 ± 3.1                                                       |
| Overweight or obesity, number (%)                | 2,803 (8.4)   | 2,104 (9.8)                                                      |
| Graduated high school, %                         | 97            | 97                                                               |
| Intelligence score, %                            |               |                                                                  |
| Low                                              | 8             | 9                                                                |
| High                                             | 16            | 15                                                               |
| Residential socioeconomic position, %            |               |                                                                  |
| Low                                              | 16            | 16                                                               |
| High                                             | 31            | 31                                                               |
| Born in Israel, %                                | 90            | 88                                                               |
| Systolic blood pressure, mmHg                    | 113.6 ± 13.2  | 113.4 ± 14.0                                                     |
| Diastolic blood pressure, mmHg                   | 71.4 ± 9.2    | 71.3 ± 9.5                                                       |
| <b>Mothers at gestational diabetes screening</b> |               |                                                                  |
| Age at delivery, years                           | 30.7 ± 4.1    | 31.2 ± 4.6                                                       |
| Range                                            | 18.1 – 47.8   | 18.1 – 49.0                                                      |
| GCT result, mg/dL                                | 110.9 ± 27.9  | 112.6 ± 28.6                                                     |
| Gestational glucose intolerance group, %         |               |                                                                  |
| Gestational normoglycemia                        | 27,914 (83.4) | 17,498 (81.9)                                                    |
| Abnormal GCT with normal OGTT                    | 2,337 (7.0)   | 1,731 (8.1)                                                      |
| Gestational IGT                                  | 1,484 (4.4)   | 993 (4.6)                                                        |
| Gestational diabetes                             | 1,747 (5.2)   | 1,140 (5.3)                                                      |
| Gestational diabetes screening year, number (%)  |               |                                                                  |
| 2001                                             | 12,866 (38.4) | 1,742 (8.2)                                                      |
| 2002                                             | 12,406 (37.1) | 2,161 (10.1)                                                     |
| 2003                                             | 7,919 (23.7)  | 5,601 (26.2)                                                     |
| 2004                                             | 291 (0.9)     | 11,858 (55.5)                                                    |

The data are means ± standard deviations (SD) unless otherwise indicated. For 21,646 women, we could not find a suitable offspring who completed pre-recruitment evaluation by January 2021, and we therefore excluded them from the cohort (Figure S1). The precise reasons for which offspring did not undergo pre-recruitment evaluation were not available to us (i.e., stillborn, death by age 16 years, or exemption from military service, see Table S2). Women without offspring who underwent pre-recruitment evaluation were characterized by higher rates of overweight or obesity at adolescence, higher proportions of gestational glucose intolerance ( $P < 0.0001$ , for both variables), and similar sociodemographic characteristics. Of note, from data extraction to the completion of preparation of this manuscript, from January 2021 to August 2021, 10,676 offspring completed the pre-recruitment evaluation (Table S2). \*284 of 21,646 women had abnormal 50-g GCT but did not complete 100-g OGTT and were thus not included in this Table.

**Supplementary Table S2: Mothers with living offspring who completed pre-recruitment evaluations, according to the year at gestational diabetes screening.**

| <b>Gestational diabetes screening, year</b> | <b>Total number of potential offspring*</b> | <b>Study cohort</b>                                         | <b>Offspring who underwent pre-recruitment evaluation from data extraction to the completion of manuscript preparation</b> |
|---------------------------------------------|---------------------------------------------|-------------------------------------------------------------|----------------------------------------------------------------------------------------------------------------------------|
|                                             |                                             | January 2017 through December 2020, number (%) <sup>†</sup> | January 2021 through August 2021, number (%) <sup>†</sup>                                                                  |
|                                             |                                             | January 2017 through August 2021, number (%)                |                                                                                                                            |
| <b>2001-2004</b>                            | 55,128                                      | 33,482 (60.7)                                               | 10,676 (19.4)                                                                                                              |
|                                             |                                             | 44,158 (80.1)                                               |                                                                                                                            |
| <b>2001</b>                                 | 14,608                                      | 12,866 (88.1)                                               | 730 (5.0)                                                                                                                  |
|                                             |                                             | 13,596 (93.1)                                               |                                                                                                                            |
| <b>2002</b>                                 | 14,567                                      | 12,406 (85.2)                                               | 1,030 (7.0)                                                                                                                |
|                                             |                                             | 13,436 (92.2)                                               |                                                                                                                            |
| <b>2003</b>                                 | 13,520                                      | 7,919 (58.6)                                                | 3,894 (28.8)                                                                                                               |
|                                             |                                             | 11,813 (87.4)                                               |                                                                                                                            |
| <b>2004</b>                                 | 12,149                                      | 291 (2.4)                                                   | 5,022 (41.3)                                                                                                               |
|                                             |                                             | 5,313 (43.7)                                                |                                                                                                                            |

\* The total number of potential offspring was determined according to the number of pregnant women who underwent gestational diabetes screening in a specific year.

† The percentages presented are the proportions of the total number of potential offspring. As mentioned in the legend of Table S1, for 21,646 women, we did not identify an offspring who underwent pre-recruitment evaluation by January 2021. From data extraction to the completion of preparation of this manuscript, from January 2021 to August 2021, 10,676 offspring underwent the pre-recruitment evaluation. This table presents their distribution according to the year their mothers underwent gestational glucose screening. As expected, the later the year that women underwent gestational diabetes screening, the lower the percent of offspring who underwent pre-recruitment evaluation. As the minimum age for pre-recruitment evaluation is 16 years, with a mean age of 17.4, the observed difference between the years mostly represents differences in offspring age at the end of follow-up. Accordingly, most offspring of pregnancies accounted for in this cohort are expected to attain pre-recruitment evaluations by the end of 2024.

**Supplementary Table S3: Characteristics at adolescence of mothers included in the study (insured by Maccabi Healthcare Services) vs. women who were insured by all health maintenance organizations in Israel.**

|                                       | <b>Women who were insured by MHS (study cohort)</b> | <b>Women who were insured by all HMOs</b> |
|---------------------------------------|-----------------------------------------------------|-------------------------------------------|
| Number of women                       | 33,482                                              | 167,410                                   |
| Age, years                            | 17.4 ± 0.4                                          | 17.4 ± 0.4                                |
| BMI, kg/m <sup>2</sup>                | 21.3 ± 2.9                                          | 21.6 ± 3.2                                |
| BMI status, number (%)                |                                                     |                                           |
| Underweight                           | 1,446 (4.3)                                         | 7,304 (4.4)                               |
| Normal BMI                            | 29,233 (87.3)                                       | 141,464 (84.5)                            |
| Overweight                            | 2,381 (7.1)                                         | 14,830 (8.9)                              |
| Mild obesity                          | 362 (1.1)                                           | 3,271 (2.0)                               |
| Severe obesity                        | 60 (0.1)                                            | 541 (0.3)                                 |
| High school graduate, %               | 97                                                  | 96                                        |
| Cognitive performance level, %        |                                                     |                                           |
| Low                                   | 8                                                   | 9                                         |
| Medium                                | 75                                                  | 75                                        |
| High                                  | 16                                                  | 14                                        |
| Residential socioeconomic position, % |                                                     |                                           |
| Low                                   | 16                                                  | 21                                        |
| High                                  | 30                                                  | 25                                        |
| Born in Israel, %                     | 90                                                  | 91                                        |
| Systolic blood pressure, mmHg         | 114 ± 12                                            | 114 ± 12                                  |
| Diastolic blood pressure, mmHg        | 72 ± 8                                              | 72 ± 8                                    |

The data are means ± standard deviations (SD) unless otherwise indicated. Israeli citizens who complete their mandatory military service are insured by one of four Israeli Health Maintenance Organizations (HMOs). Maccabi Healthcare Services (MHS) is responsible for insuring 26% of the Israeli population, with 2.5 million members. Women who were insured by all Israeli HMOs and underwent pre-recruitment evaluation were matched by calendar year of pre-recruitment evaluation in a 1:5 ratio to women in the main study cohort. This matching was performed to accurately present the comparison given the secular trend of some of the study variables (such as adolescent BMI<sup>1</sup>). For continuous variables, the mean ± SD is given unless specified otherwise. BMI was classified into five groups according to U.S. Center for Disease Control and Prevention percentiles: underweight (<5<sup>th</sup>), normal BMI (5<sup>th</sup> through 85<sup>th</sup>), overweight (85<sup>th</sup> through 95<sup>th</sup>), mild obesity (95<sup>th</sup> through 120% of the 95<sup>th</sup>), and severe obesity (>120% of the 95<sup>th</sup>). Women insured in MHS vs. those insured by other HMOs had lower prevalences of adolescent overweight/obesity (8.3% vs. 11.2%,  $P<0.0001$ ) and slightly higher rank in all sociodemographic variables.

<sup>1</sup> Twig, G., et al. "Body mass index and infectious disease mortality in midlife in a cohort of 2.3 million adolescents." *International Journal of Obesity* 42.4 (2018): 801-807.

**Supplementary Table S4: Odds ratios of gestational glucose intolerance in a model that adjusted for adolescent BMI of the offspring's fathers.**

|                                                                    | Gestational normoglycemia | Abnormal GCT with normal OGTT | Gestational IGT | Gestational diabetes |
|--------------------------------------------------------------------|---------------------------|-------------------------------|-----------------|----------------------|
| Main analysis                                                      |                           |                               |                 |                      |
| Number of mother-offspring pairs                                   | 27,484                    | 2,302                         | 1,460           | 1,706                |
| Number of offspring with overweight or obesity                     | 5,127                     | 505                           | 348             | 429                  |
| OR                                                                 | 1 (reference)             | 1.24                          | 1.33            | 1.43                 |
| 95% CI                                                             |                           | 1.11 – 1.38                   | 1.17 – 1.51     | 1.27 – 1.61          |
| Model with adjustment for paternal adolescent BMI of the offspring |                           |                               |                 |                      |
| Number of mother-offspring pairs                                   | 25,873                    | 2,161                         | 1,367           | 1,576                |
| Number of offspring with overweight or obesity                     | 4,809                     | 486                           | 328             | 397                  |
| OR                                                                 | 1 (reference)             | 1.28                          | 1.29            | 1.40                 |
| 95% CI                                                             |                           | 1.15 – 1.43                   | 1.13 – 1.48     | 1.23 – 1.58          |

Analyses were adjusted for model 1: mothers' data at adolescence (age, intelligence score, years of education, residential socioeconomic position, birthplace, and BMI) and age at gestational diabetes screening. Data on calculated paternal BMI, based on measured weight and height at pre-recruitment evaluations at adolescence, were available for 94% of the cohort. The main analysis is shown to facilitate comparison.

OR, odds ratio; CI, confidence interval; GCT, glucose challenge test; OGTT, oral glucose tolerance test; IGT, impaired glucose tolerance

**Supplementary Table S5: A sensitivity analysis limited to mothers who were screened during the year 2001.**

|                                                | Gestational normoglycemia | Abnormal GCT with normal OGTT | Gestational IGT | Gestational diabetes |
|------------------------------------------------|---------------------------|-------------------------------|-----------------|----------------------|
| Main analysis                                  |                           |                               |                 |                      |
| Number of mother-offspring pairs               | 27,484                    | 2,302                         | 1,460           | 1,706                |
| Number of offspring with overweight or obesity | 5,127                     | 505                           | 348             | 429                  |
| OR                                             | 1 (reference)             | 1.24                          | 1.33            | 1.43                 |
| 95% CI                                         |                           | 1.11 – 1.38                   | 1.17 – 1.51     | 1.27 – 1.61          |
| Mothers who were screened in 2001              |                           |                               |                 |                      |
| Number of mother-offspring pairs               | 10,606                    | 837                           | 555             | 667                  |
| Number of offspring with overweight or obesity | 2,050                     | 211                           | 142             | 178                  |
| OR                                             | 1 (reference)             | 1.37                          | 1.36            | 1.45                 |
| 95% CI                                         |                           | 1.16 – 1.63                   | 1.11 – 1.67     | 1.20 – 1.74          |

We limited the analysis to include women who were screened for gestational diabetes during 2001, in which 88% (12,866 of 14,608) of the women had offspring with complete pre-recruitment evaluation. The main analysis is shown to facilitate comparison. The analyses were all adjusted for model 1. Point estimates were similar.

OR, odds ratio; CI, confidence interval; GCT, glucose challenge test; OGTT, oral glucose tolerance test; IGT, impaired glucose tolerance



**Supplementary Table S6: A sensitivity analysis limited to mothers without overweight/obesity at adolescence.**

|                                                        | Gestational normoglycemia | Abnormal GCT with normal OGTT | Gestational IGT | Gestational diabetes |
|--------------------------------------------------------|---------------------------|-------------------------------|-----------------|----------------------|
| Main analysis                                          |                           |                               |                 |                      |
| Number of mother-offspring pairs                       | 27,484                    | 2,302                         | 1,460           | 1,706                |
| Number of offspring with overweight or obesity         | 5,127                     | 505                           | 348             | 429                  |
| OR                                                     | 1 (reference)             | 1.24                          | 1.33            | 1.43                 |
| 95% CI                                                 |                           | 1.11 – 1.38                   | 1.17 – 1.51     | 1.27 – 1.61          |
| Mothers with underweight or normal BMI at adolescence* |                           |                               |                 |                      |
| Number of mother-offspring pairs                       | 25,288                    | 2,091                         | 1,313           | 1,507                |
| Number of offspring with overweight or obesity         | 4,319                     | 412                           | 260             | 331                  |
| OR                                                     | 1 (reference)             | 1.22                          | 1.18            | 1.40                 |
| 95% CI                                                 |                           | 1.09 – 1.37                   | 1.02 – 1.36     | 1.23 – 1.60          |
| Mothers with low normal BMI at adolescence**           |                           |                               |                 |                      |
| Number of mother-offspring pairs                       | 13,441                    | 1,087                         | 651             | 783                  |
| Number of offspring with overweight or obesity         | 1,698                     | 166                           | 103             | 122                  |
| OR                                                     | 1 (reference)             | 1.27                          | 1.33            | 1.31                 |
| 95% CI                                                 |                           | 1.07 – 1.51                   | 1.07 – 1.65     | 1.07 – 1.60          |

The analyses were adjusted for model 1. \* The analysis was limited to mothers with underweight or normal BMI (<85<sup>th</sup> percentile) at pre-recruitment evaluation. \*\* The analysis was limited to mothers with low-normal BMI (5-50<sup>th</sup> percentile) at pre-recruitment evaluation. The main analysis is shown to facilitate comparison.

OR, odds ratio; CI, confidence interval; BMI, body mass index; GCT, glucose challenge test; OGTT, oral glucose tolerance test; IGT, impaired glucose tolerance

**Supplementary Table S7: A sensitivity analysis limited to mothers with unimpaired health at adolescence.**

|                                                          | Gestational normoglycemia | Abnormal GCT with normal OGTT | Gestational IGT | Gestational diabetes |
|----------------------------------------------------------|---------------------------|-------------------------------|-----------------|----------------------|
| Main analysis                                            |                           |                               |                 |                      |
| Number of mother-offspring pairs                         | 27,484                    | 2,302                         | 1,460           | 1,706                |
| Number of offspring with overweight or obesity           | 5,127                     | 505                           | 348             | 429                  |
| OR                                                       | 1 (reference)             | 1.24                          | 1.33            | 1.43                 |
| 95% CI                                                   |                           | 1.11 – 1.38                   | 1.17 – 1.51     | 1.27 – 1.61          |
| Unimpaired maternal health at pre-recruitment evaluation |                           |                               |                 |                      |
| Number of mother-offspring pairs                         | 21,984                    | 1,811                         | 1,177           | 1,354                |
| Number of offspring with overweight or obesity           | 4,102                     | 398                           | 283             | 333                  |
| OR                                                       | 1 (reference)             | 1.26                          | 1.35            | 1.39                 |
| 95% CI                                                   |                           | 1.12 – 1.42                   | 1.17 – 1.55     | 1.22 – 1.59          |

The analysis was adjusted for model 1. Unimpaired health was defined as without any indication of chronic medical treatment, history of major surgery, or cancer<sup>2</sup>. The main analysis is shown to facilitate comparison.

OR, odds ratio; CI, confidence interval; GCT, glucose challenge test; OGTT, oral glucose tolerance test; IGT, impaired glucose tolerance

---

<sup>2</sup> Twig, Gilad, et al. "Body-mass index in 2.3 million adolescents and cardiovascular death in adulthood." *New England Journal of Medicine* 374.25 (2016): 2430-2440.

**Supplementary Table S8: Odds ratios of gestational glucose intolerance in a model in which the study outcome was defined as a combination of offspring adolescent abnormal blood pressure and overweight/obesity.**

|                                                                            | Gestational normoglycemia | Abnormal GCT with normal OGTT | Gestational IGT | Gestational diabetes |
|----------------------------------------------------------------------------|---------------------------|-------------------------------|-----------------|----------------------|
| Main analysis                                                              |                           |                               |                 |                      |
| Number of mother-offspring pairs                                           | 27,484                    | 2,302                         | 1,460           | 1,706                |
| Number of offspring with overweight or obesity                             | 5,127                     | 505                           | 348             | 429                  |
| OR                                                                         | 1 (reference)             | 1.24                          | 1.33            | 1.43                 |
| 95% CI                                                                     |                           | 1.11 – 1.38                   | 1.17 – 1.51     | 1.27 – 1.61          |
| Outcome of overweight/obesity combined with abnormal blood pressure        |                           |                               |                 |                      |
| Number of mother-offspring pairs                                           | 27,421                    | 2,291                         | 1,455           | 1,701                |
| Number of offspring with overweight or obesity and abnormal blood pressure | 1,706                     | 188                           | 108             | 164                  |
| OR                                                                         | 1 (reference)             | 1.39                          | 1.25            | 1.66                 |
| 95% CI                                                                     |                           | 1.18 – 1.64                   | 1.02 – 1.54     | 1.39 – 1.98          |

The analysis was adjusted for model 1. Blood pressure was measured as part of the pre-recruitment evaluation at adolescence. The outcome was defined as offspring with overweight/obesity and abnormal blood pressure (systolic blood pressure  $\geq 130$  mmHg and/or diastolic blood pressure  $\geq 80$  mmHg) at adolescence. The main analysis is shown to facilitate comparison.

OR, odds ratio; CI, confidence interval; GCT, glucose challenge test; OGTT, oral glucose tolerance test; IGT, impaired glucose tolerance

**Supplementary Table S9: Odds ratios of gestational glucose intolerance using WHO definitions for overweight, mild obesity and severe obesity.**

|                                          | Gestational normoglycemia | Abnormal GCT with normal OGTT | Gestational IGT | Gestational diabetes |
|------------------------------------------|---------------------------|-------------------------------|-----------------|----------------------|
| CDC definition for overweight or obesity |                           |                               |                 |                      |
| OR                                       | 1 (reference)             | 1.24                          | 1.33            | 1.43                 |
| 95% CI                                   |                           | 1.11 – 1.38                   | 1.17 – 1.51     | 1.27 – 1.61          |
| WHO definition overweight or obesity     |                           |                               |                 |                      |
| OR                                       | 1 (reference)             | 1.21                          | 1.25            | 1.42                 |
| 95% CI                                   |                           | 1.09 – 1.33                   | 1.10 – 1.41     | 1.27 – 1.59          |
| CDC definition for overweight            |                           |                               |                 |                      |
| OR                                       | 1 (reference)             | 1.19                          | 1.15            | 1.21                 |
| 95% CI                                   |                           | 1.05 – 1.36                   | 0.98 – 1.35     | 1.04 – 1.40          |
| WHO definition for overweight            |                           |                               |                 |                      |
| OR                                       | 1 (reference)             | 1.17                          | 1.09            | 1.26                 |
| 95% CI                                   |                           | 1.05 – 1.31                   | 0.95 – 1.26     | 1.11 – 1.44          |
| CDC definition for mild obesity          |                           |                               |                 |                      |
| OR                                       | 1 (reference)             | 1.23                          | 1.54            | 1.79                 |
| 95% CI                                   |                           | 1.03 – 1.48                   | 1.25 – 1.89     | 1.49 – 2.15          |
| WHO definition for mild obesity          |                           |                               |                 |                      |
| OR                                       | 1 (reference)             | 1.24                          | 1.56            | 1.75                 |
| 95% CI                                   |                           | 1.04 – 1.48                   | 1.28 – 1.91     | 1.46 – 2.09          |
| CDC definition for severe obesity        |                           |                               |                 |                      |
| OR                                       | 1 (reference)             | 1.66                          | 2.16            | 1.98                 |
| 95% CI                                   |                           | 1.24 – 2.24                   | 1.56 – 2.99     | 1.45 – 2.70          |
| WHO definition for severe obesity        |                           |                               |                 |                      |
| OR                                       | 1 (reference)             | 1.68                          | 2.27            | 2.36                 |
| 95% CI                                   |                           | 1.18 – 2.41                   | 1.56 – 3.32     | 1.66 – 3.35          |

Analyses were adjusted for model 1. Main analyses (CDC definition) are shown to facilitate comparison. WHO definitions for BMI status were as follows: 1 SD above the WHO Growth Reference median for overweight, 2-3 SD for mild obesity and 3 SD for severe obesity.

CDC, centers for disease control; WHO: world health organization; OR, odds ratio; CI, confidence interval

**Supplementary Table S10: A sensitivity analysis limited to mothers who were not treated with insulin during pregnancy.**

|                                                 | Gestational normoglycemia | Gestational diabetes |
|-------------------------------------------------|---------------------------|----------------------|
| Main analysis                                   |                           |                      |
| Number of mother-offspring pairs                | 27,484                    | 1,706                |
| Number of offspring with overweight or obesity  | 5,127                     | 429                  |
| OR                                              | 1 (reference)             | 1.43                 |
| 95% CI                                          |                           | 1.27 – 1.61          |
| Excluding mothers who were treated with insulin |                           |                      |
| Number of mother-offspring pairs                | 27,484                    | 1,591                |
| Number of offspring with overweight or obesity  | 5,127                     | 397                  |
| OR                                              | 1 (reference)             | 1.43                 |
| 95% CI                                          |                           | 1.26 – 1.62          |

The analysis was adjusted for model 1. Data regarding insulin treatment were retrieved from Maccabi Healthcare Services. In the adjusted model, we excluded mothers with gestational diabetes who were treated with insulin (n=115 mothers, 7% of those with gestational diabetes). The main analysis is shown to facilitate comparison.

OR, odds ratio; CI, confidence interval

**Supplementary Table S11: A sensitivity analysis limited to women who were not diagnosed with type 2 diabetes 2 after delivery and until data extraction.**

|                                                                    | Gestational normoglycemia | Abnormal GCT with normal OGTT | Gestational IGT | Gestational diabetes |
|--------------------------------------------------------------------|---------------------------|-------------------------------|-----------------|----------------------|
| Diagnosed with type 2 diabetes after pregnancy, number (%)         | 189 (0.7)                 | 56 (2.3)                      | 95 (6.2)        | 259 (14.6)           |
| Main analysis                                                      |                           |                               |                 |                      |
| Number of mother-offspring pairs                                   | 27,484                    | 2,302                         | 1,460           | 1,706                |
| Number of offspring with overweight or obesity                     | 5,127                     | 505                           | 348             | 429                  |
| OR                                                                 | 1 (reference)             | 1.24                          | 1.33            | 1.43                 |
| 95% CI                                                             |                           | 1.11 – 1.38                   | 1.17 – 1.51     | 1.27 – 1.61          |
| Mothers who were not diagnosed with type 2 diabetes after delivery |                           |                               |                 |                      |
| Number of mother-offspring pairs                                   | 27,307                    | 2,251                         | 1,373           | 1,453                |
| Number of offspring with overweight or obesity                     | 5,067                     | 486                           | 311             | 347                  |
| OR                                                                 | 1 (reference)             | 1.22                          | 1.27            | 1.40                 |
| 95% CI                                                             |                           | 1.10 – 1.36                   | 1.11 – 1.45     | 1.23 – 1.60          |

The analyses were adjusted for model 1. Data regarding the diagnosis of type 2 diabetes were retrieved from Maccabi Healthcare Services until August 20<sup>th</sup>, 2020. Rates of postpartum type 2 diabetes, diagnosed at least three months after delivery, were 0.7%, 2.3%, 6.2%, and 14.6% among mothers with gestational normoglycemia, abnormal GCT with normal OGTT, gestational IGT, and gestational diabetes, respectively. Excluding these women yielded similar results to the main analysis. The main analysis is shown to facilitate comparison.

OR, odds ratio; CI, confidence interval; GCT, glucose challenge test; OGTT, oral glucose tolerance test; IGT, impaired glucose tolerance
